# Supplementary material
Source: Springer Nature journal article supplement (https://www.springermedizin.de/resource/supplementary/12882_2012_276_MOESM2_ESM.pdf/9453576)

**A**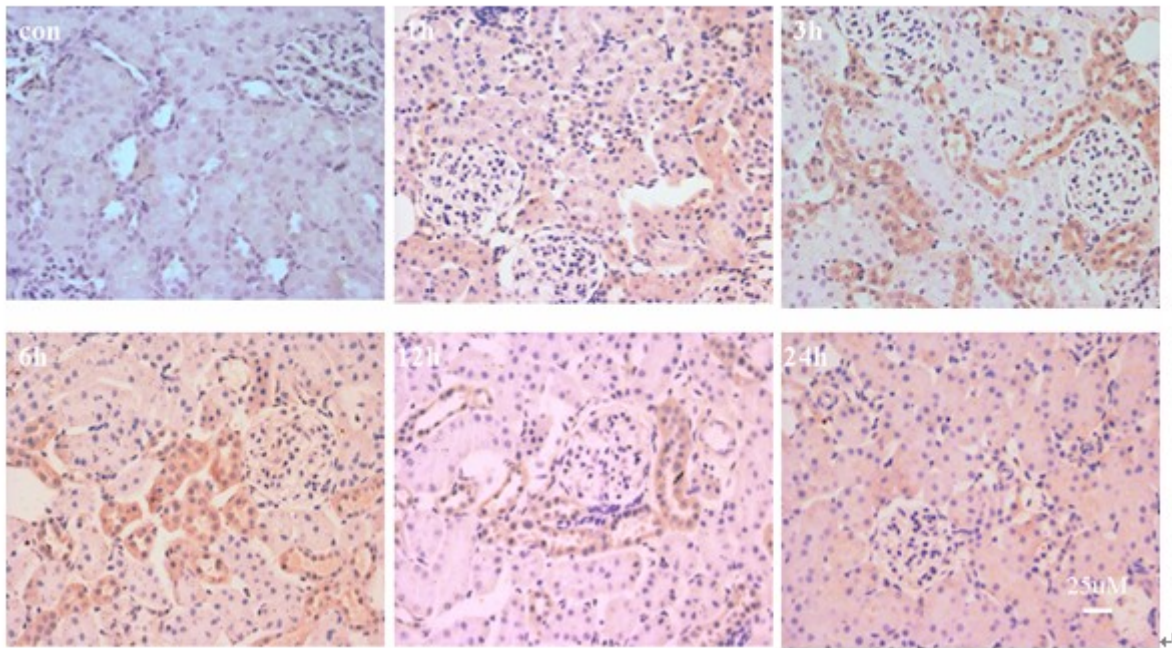**B**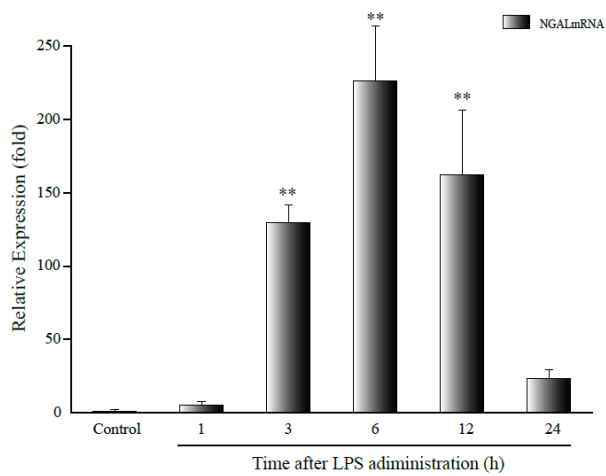**C**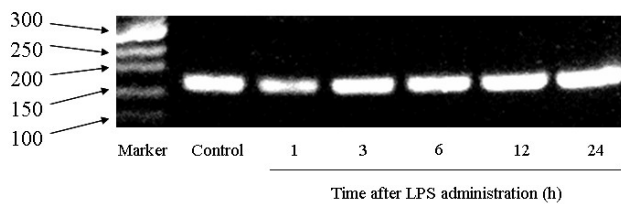

Supplement: MOESM2 [file 9453576]
